# Supplementary material
Source: publisher figshare collection journal article supplement (https://frontiersin.figshare.com/ndownloader/files/17449211)
Supplement: Supplementary file [file 17449211]

# Localization of Retinal Ca<sup>2+</sup>/Calmodulin-dependent Kinase II- $\beta$ (CaMKII- $\beta$ ) at Bipolar Cell Gap Junctions and Cross-reactivity of a Monoclonal Anti-CaMKII- $\beta$ Antibody with Connexin36

Stephan Tetenborg<sup>1</sup>, Shubhash Chandra Yadav<sup>1</sup>, Bianca Brüggemann<sup>1#</sup>, Georg R. Zoidl<sup>2</sup>, Sheriar G. Hormuzdi<sup>3</sup>, Hannah Monyer<sup>4</sup>, Geeske M. van Woerden<sup>5</sup>, Ulrike Janssen-Bienhold<sup>6,7</sup>, Karin Dedek<sup>1,7\*</sup>

<sup>1</sup>Animal Navigation/Neurosensorys, Institute for Biology and Environmental Sciences, University of Oldenburg, Oldenburg, Germany

<sup>2</sup>Department of Biology & Center for Vision Research, York University, Toronto, Canada

<sup>3</sup>Division of Neuroscience, Ninewells Hospital and Medical School, University of Dundee, Dundee, UK

<sup>4</sup>Cancer Research Center (DKFZ), Heidelberg, Germany

<sup>5</sup>Department of Neuroscience, Erasmus MC University Medical Center, Rotterdam, Netherlands

<sup>6</sup>Visual Neuroscience, Dept. of Neuroscience, University of Oldenburg, Oldenburg, Germany

<sup>7</sup>Research Center Neurosensory Science, University of Oldenburg, Oldenburg, Germany

#Present address: Institute for Anatomy and Molecular Neurobiology, Westfälische Wilhelms-University, Münster, Germany

Running title: CaMKII- $\beta$  and retinal gap junctions

## \*Correspondence:

Karin Dedek

[karin.dedek@uni-oldenburg.de](mailto:karin.dedek@uni-oldenburg.de)

## 1 Supplementary Figures and Tables

### 1.1 Supplementary Figures

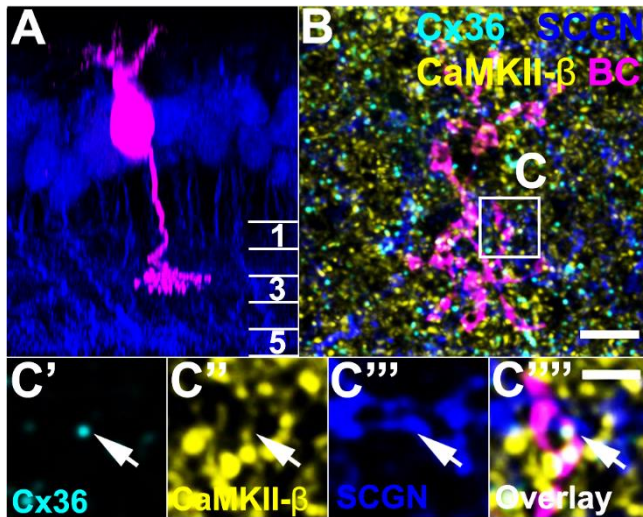

**Supplementary Figure 1.** CaMKII- $\beta$  may regulate inter-bipolar cell gap junctions. (A) XZ rotation of an Alexa568-injected type 5 bipolar cell (BC), immunolabeled for secretagogin (SCGN). Numbers and lines indicate the different layers of the inner plexiform layer. (B) XY view, showing the axon terminal of the same cell in the retinal whole-mount, labeled for connexin36 (Cx36), CaMKII- $\beta$  and SCGN. The area marked by the white square is shown in higher magnification as single confocal scan in C'-C'''''. (C'-C''''') Cx36 colocalized with CaMKII- $\beta$  at a contact point of two bipolar cell dendrites in layer 3 of the inner plexiform layer. It presumably represents heterologous coupling between different type 5 bipolar cell subtypes (Tsukamoto and Omi, 2017). Scale bar: B, 5  $\mu$ m, C'-C''''', 2  $\mu$ m.

## 2 Supplementary References

Tsukamoto, Y., and Omi, N. (2017). Classification of Mouse Retinal Bipolar Cells: Type-Specific Connectivity with Special Reference to Rod-Driven AII Amacrine Pathways. *Front Neuroanat* 11, 92. doi:10.3389/fnana.2017.00092.
